# Supplementary material for: Constructing an efficient electrocatalyst for water oxidation: an Fe-doped CoO/Co catalyst enabled by in situ MOF growth and a solvent-free strategy
Source: Royal Society of Chemistry journal article supplement (doi:10.1039/d3dt02699j), 2023-01-01
Supplement: d3dt02699j1.pdf [file d3dt02699j1.pdf]

## Electronic Supplementary Information

### **Constructing an Efficient Electrocatalyst for Water Oxidation: A Fe-Doped CoO/Co Catalyst Enabled by in-situ MOF Growth and Solvent-Free Strategy**

Sanmei Liu, Yanping Yang, Minli Zhong, Shengchen Li, Shunli Shi\*, Weimin Xiao, Shuhua Wang, Chao Chen\*

*Key Laboratory of Jiangxi Province for Environment and Energy Catalysis, School of Chemistry and Chemical Engineering, Nanchang University, Nanchang 330031, P. R. China*

\* Corresponding author.

E-mail address: [chaochen@ncu.edu.cn](mailto:chaochen@ncu.edu.cn) (C. Chen); [shunlishi@ncu.edu.cn](mailto:shunlishi@ncu.edu.cn) (S.L. Shi)

## Table of contents

|                                                                                                                              |    |
|------------------------------------------------------------------------------------------------------------------------------|----|
| <b>Fig. S1.</b> –XRD patterns of $\text{Co}(\text{Ac})_2$ calcination with/without a little $\text{Zn}(\text{Ac})_2$ . ..... | 3  |
| <b>Fig. S2.</b> (A) EDS of Fe-CoO/Co and (B) pore size distribution of CoO/Co and Fe-CoO/Co.....                             | 4  |
| <b>Fig. S3.</b> –EPR characterization of ZIF-67/Co and Fe-CoO/Co .....                                                       | 4  |
| <b>Fig. S4.</b> –The equivalent circuit model.....                                                                           | 5  |
| <b>Fig. S5.</b> –Liner scan curves and (B) EIS for Ni-CoO/Co with different atom ratios of Ni/Co .....                       | 5  |
| <b>Fig. S6.</b> –Chronopotentiometric curves for Fe-CoO/Co at 10, 20 and 50 $\text{mA cm}^{-2}$ .....                        | 6  |
| <b>Fig. S7.</b> –EIS before and after 10 h for the optimized Fe-CoO/Co .....                                                 | 6  |
| <b>Fig. S8.</b> –XRD patterns of (A) Fe-CoO-Z and Fe-CoO/Co-D.....                                                           | 7  |
| <b>Fig. S9.</b> –CV curves of (A) Fe-CoO-Z, (B) Fe-CoO/Co-D and Fe-CoO/Co.....                                               | 8  |
| <b>Table S1</b> –The results of element analysis for CoO/Co and Fe-CoO/Co.....                                               | 9  |
| <b>Table S2</b> –The ICP-OES results for Fig. 4C .....                                                                       | 10 |
| <b>Table S3</b> –The fitted element values of equivalent circuit for Fig. 4B .....                                           | 11 |
| <b>Table S4</b> –The fitted element values of equivalent circuit for Fig. S5B .....                                          | 12 |
| <b>Table S5</b> –Comparison of OER performance of Co-MOF-based electrocatalysts.....                                         | 13 |
| <b>Table S6</b> –The fitted element values of equivalent circuit for Fig. 5B .....                                           | 14 |
| <b>Table S7</b> –The fitted element values of equivalent circuit for Fig. 7B.....                                            | 15 |
| <b>References</b> .....                                                                                                      | 16 |

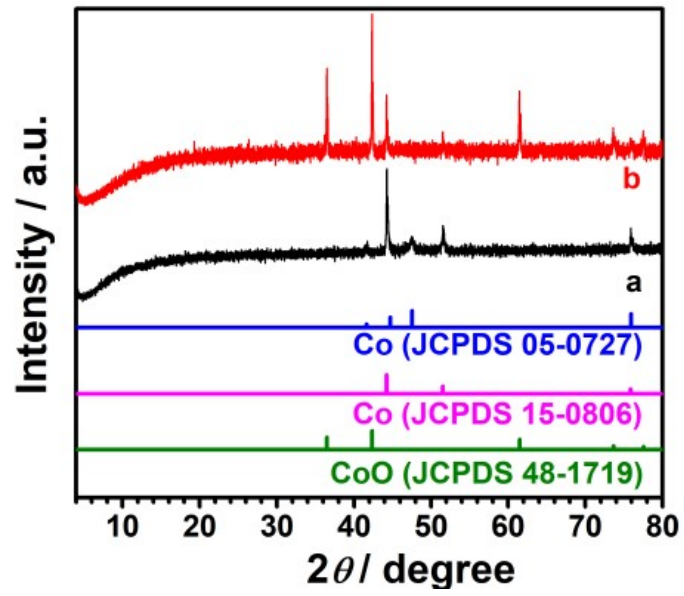

**Fig. S1.** XRD patterns of  $\text{Co}(\text{Ac})_2$  calcination (a) without and (b) with a little  $\text{Zn}(\text{Ac})_2$ .

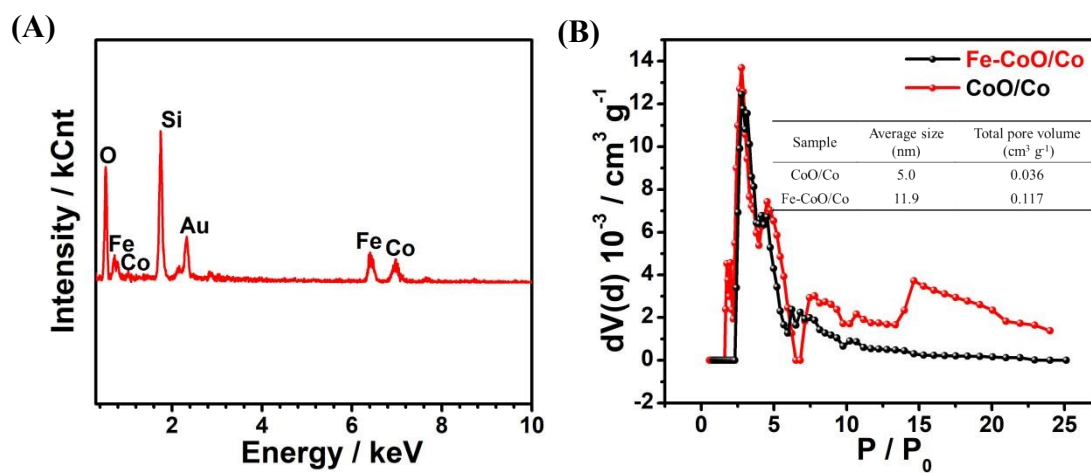

Fig. S2. (A) EDS of Fe-CoO/Co and (B) pore size distribution of CoO/Co and Fe-CoO/Co.

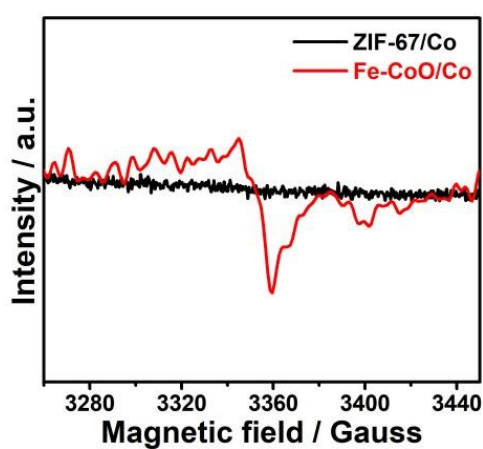

Fig. S3. EPR characterization of ZIF-67/Co and Fe-CoO/Co.

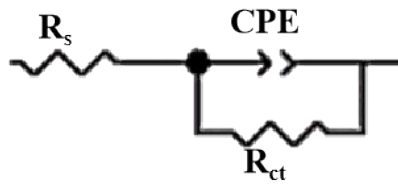

Fig. S4. The equivalent circuit model.

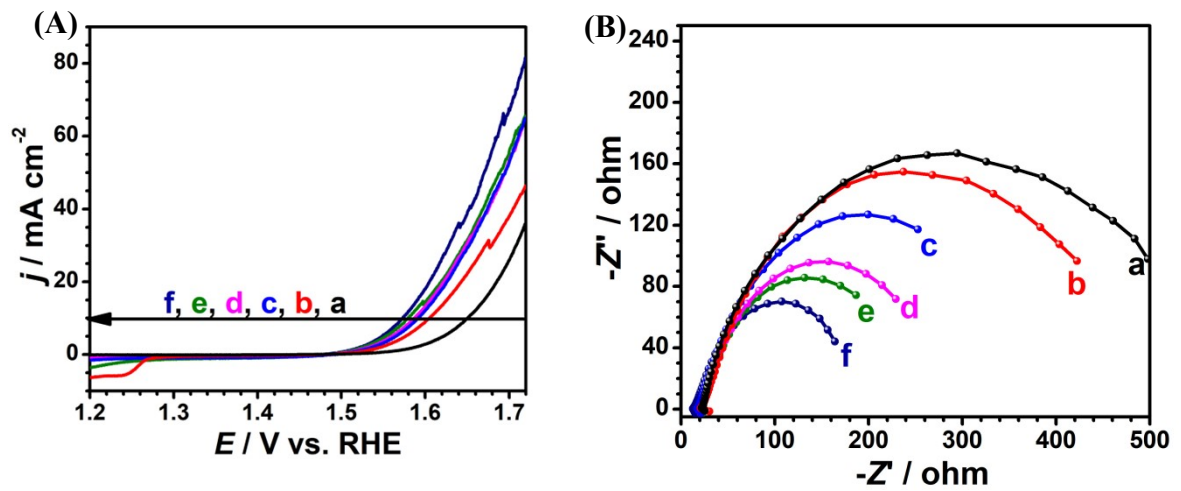

Fig. S5. (A) Linear scan curves and (B) EIS for Ni-CoO/Co with different atom ratios of Ni/Co (a: 0/1, b: 0.33, c: 0.5, d: 3.0, e: 2.0 and f: 1.0).

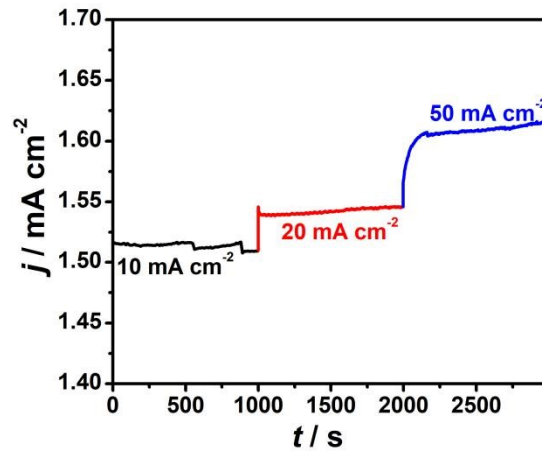

**Fig. S6.** Chronopotentiometric curves for Fe-CoO/Co at 10, 20 and 50 mA cm<sup>-2</sup>.

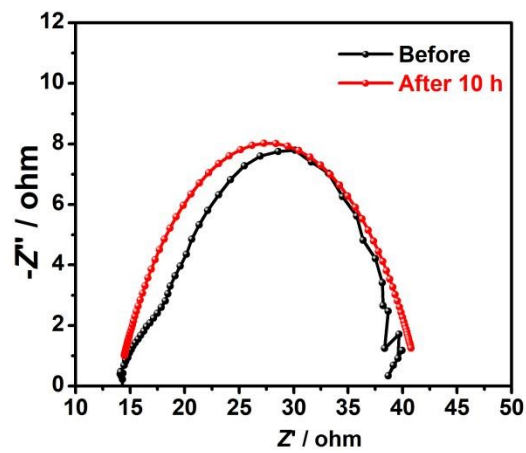

**Fig. S7.** EIS after 10 h stability test for the optimized Fe-CoO/Co.

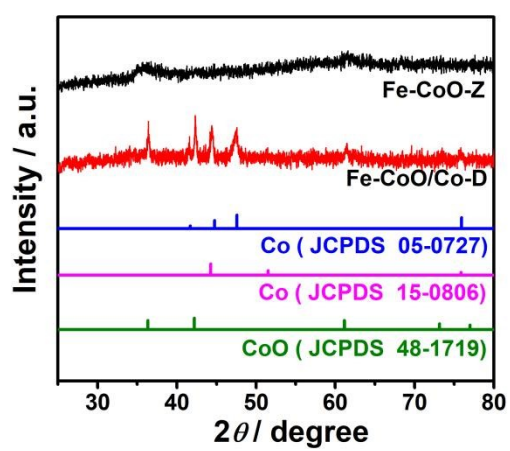

**Fig. S8.** XRD patterns of (A) Fe-CoO-Z and Fe-CoO/Co-D.

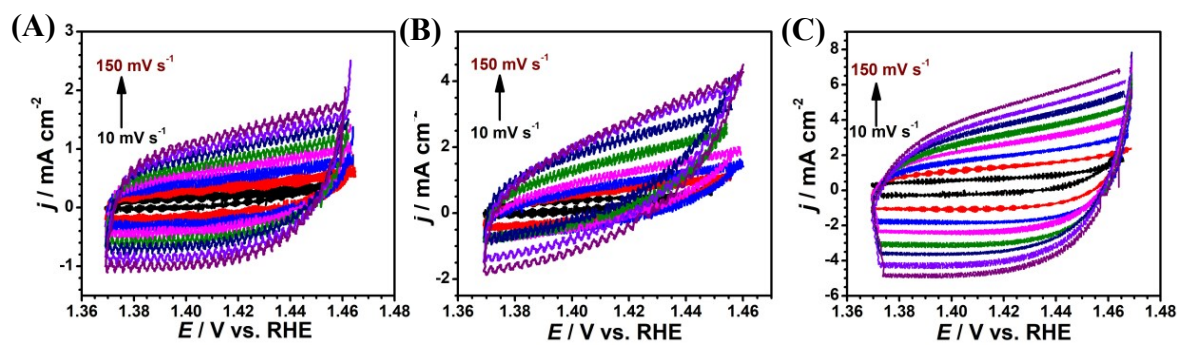

**Fig. S9.** CV curves of (A) Fe-CoO-Z, (B) Fe-CoO/Co-D and Fe-CoO/Co



**Table S1** The results of element analysis for CoO/Co and Fe-CoO/Co

| Sample    | C (wt%) | N (wt%) |
|-----------|---------|---------|
| CoO/Co    | 0.14    | /       |
| Fe-CoO/Co | 0.18    | /       |

**Table S2** The ICP-OES results for Fig. 4A

| Element  | a     | b     | c    | d     | e     | f     |
|----------|-------|-------|------|-------|-------|-------|
| Co (at%) | 41.05 | 33.19 | 27.4 | 23.65 | 13.68 | 10.26 |
| Fe (at%) | 0     | 7.76  | 9.61 | 16.46 | 23.36 | 28.82 |

**Table S3** The fitted element values of equivalent circuit for Fig. 4B

| No. | Fe/Co (actual ratio) | $R_s / \Omega$ | CPE                         |      | $R_{ct} / \Omega$ |
|-----|----------------------|----------------|-----------------------------|------|-------------------|
|     |                      |                | $Q / 10^{-4} \text{ S s}^n$ | $n$  |                   |
| a   | 0/1                  | 22.5           | 10.3                        | 0.77 | 522.8             |
| b   | 0.23                 | 18.0           | 43.2                        | 0.72 | 80.5              |
| c   | 0.35                 | 20.5           | 43.5                        | 0.70 | 61.7              |
| d   | 0.7                  | 20.2           | 46.5                        | 0.78 | 40.2              |
| e   | 1.7                  | 16.3           | 51.3                        | 0.74 | 23.6              |
| f   | 2.7                  | 20.3           | 48.3                        | 0.76 | 33.1              |

**Table S4** The fitted element values of equivalent circuit for Fig. S5B

| No. | Ni/Co (feeding ratio) | $R_s / \Omega$ | CPE                         |      | $R_{ct} / \Omega$ |
|-----|-----------------------|----------------|-----------------------------|------|-------------------|
|     |                       |                | $Q / 10^{-4} \text{ S s}^n$ | $n$  |                   |
| a   | 0/1                   | 22.5           | 10.3                        | 0.77 | 522.8             |
| b   | 0.33                  | 19.0           | 20.2                        | 0.79 | 465.7             |
| c   | 0.5                   | 19.1           | 30.2                        | 0.78 | 365.7             |
| d   | 3.0                   | 19.3           | 39.0                        | 0.76 | 262.0             |
| e   | 2.0                   | 22.1           | 39.2                        | 0.80 | 260.0             |
| f   | 1.0                   | 18.4           | 42.2                        | 0.78 | 190.4             |

**Table S5** Comparison of OER performance of Co-MOF-based electrocatalysts

| Catalyst                                                                | Electrolyte    | Substrate | Overpotential<br>at 10 mA/cm <sup>-2</sup><br>(mV) | Ref.             |
|-------------------------------------------------------------------------|----------------|-----------|----------------------------------------------------|------------------|
| Fe <sub>1</sub> Co <sub>1</sub> -P/C                                    | 1 M KOH        | GC        | 360                                                | 1                |
| (Fe(II) <sub>1</sub> Fe(III) <sub>1</sub> ) <sub>0.6</sub> /NMOF<br>-Co | 1 M KOH        | GC        | 330                                                | 2                |
| Fe-doped Co <sub>3</sub> O <sub>4</sub>                                 | 1 M KOH        | GC        | 318                                                | 3                |
| CoFe-MOF-OH                                                             | 1 M KOH        | GC        | 310                                                | 4                |
| Co <sub>3</sub> O <sub>4</sub> /Co-Fe oxide                             | 1 M KOH        | GC        | 297                                                | 5                |
| Fe(OH) <sub>3</sub> @Co-MOF-74                                          | 1 M KOH        | CP        | 294                                                | 6                |
| A <sub>2.7</sub> B-MOF-FeCo <sub>1.6</sub>                              | 1 M KOH        | GC        | 288                                                | 7                |
| <b>Fe-CoO/Co</b>                                                        | <b>1 M KOH</b> | <b>GC</b> | <b>276</b>                                         | <b>This work</b> |

A<sub>2.7</sub>B = terephthalic (A) and 2-aminoterephthalic ligands (B)

**Table S6** The fitted element values of equivalent circuit for Fig. 5C

| No. | Sample              | $R_s / \Omega$ | CPE                         |      | $R_{ct} / \Omega$ |
|-----|---------------------|----------------|-----------------------------|------|-------------------|
|     |                     |                | $Q / 10^{-4} \text{ S s}^n$ | $n$  |                   |
| 1   | Fe-Co/CoO           | 16.3           | 51.3                        | 0.74 | 23.6              |
| 2   | Ni-Co/CoO           | 18.4           | 42.2                        | 0.78 | 190.4             |
| 3   | IrO <sub>2</sub> /C | 17.6           | 31.8                        | 0.91 | 307               |

**Table S7** The fitted element values of equivalent circuit for Fig. 7B

| No. | Sample      | $R_s / \Omega$ | CPE                         |      | $R_{ct} / \Omega$ |
|-----|-------------|----------------|-----------------------------|------|-------------------|
|     |             |                | $Q / 10^{-4} \text{ S s}^n$ | $n$  |                   |
| 1   | Fe-CoO-Z    | 27.2           | 31.5                        | 0.74 | 317               |
| 2   | Fe-CoO/Co-D | 28.9           | 41.9                        | 0.76 | 90.6              |
| 3   | Fe-CoO/Co   | 16.3           | 51.3                        | 0.74 | 23.6              |

## References

1. W. Hong, M. Kitta and Q. Xu, *Small Methods*, 2018, **2**, 1800214.
2. M. Zhao, T. Guo, W. Qian, Z. Wang, X. Zhao, L. Wen and D. He, *Chem. Eng. J.*, 2021, **422**, 130055.
3. K. Min, M. Hwang, S. E. Shim, D. Lim and S.-H. Baeck, *Chem. Eng. J.*, 2021, **424**, 130400.
4. Z. Zou, T. Wang, X. Zhao, W. Jiang, H. Pan, D. Gao and C. Xu, *ACS Catal.*, 2019, **9**, 7356-7364.
5. X. Wang, L. Yu, B. Y. Guan, S. Song and X. Lou, *Adv. Mater.*, 2018, **30**, 1801211.
6. Z. Gao, Z. W. Yu, F. Q. Liu, C. Yang, Y. Yuan, Y. Yu and F. Luo, *ChemSusChem*, 2019, **12**, 4623-4628.
7. Z. Xue, Y. Li, Y. Zhang, W. Geng, B. Jia, J. Tang, S. Bao, H. Wang, Y. Fan, Z. Wei, Z. Zhang, Z. Ke, G. Li and C.-Y. Su, *Adv. Energy Mater.*, 2018, **8**, 1801564.
